# Supplementary material for: Pressure-controlled aggregation in carboxylic acids. A case study on the polymorphism of bromochlorofluoroacetic acid
Source: Royal Society of Chemistry journal article supplement (doi:10.1039/b910409g), 2009-01-01
Supplement: b910409g.pdf [file b910409g.pdf]

# **Pressure-controlled aggregation in carboxylic-acids. A case study of the polymorphism of bromochlorofluoroaceticacid.**

*Roman Gajda,<sup>a</sup> Andrzej Katrusiak<sup>a\*</sup> and Jeanne Crassous<sup>b</sup>*

<sup>a</sup>Faculty of Chemistry, Adam Mickiewicz University, Grunwaldzka 6, 60-780 Poznań, Poland

<sup>b</sup>Sciences Chimiques de Rennes, Campus de Beaulieu, UMR 6226, CNRS-Université de Rennes 1,  
35042 Rennes Cedex, France

katran@amu.edu.pl

**Abstract:** Pressure induces different hydrogen-bonding patterns in the polymorphs of bromochlorofluoroacetic acid, CBrClF<sub>2</sub>COOH, by affecting the balance between secondary intermolecular interactions involving halogen and oxygen atoms. In polymorph  $\alpha$  a pattern of the molecules syn-syn H-bonded into catemers is strongly corrugated, up to the limit imposed by steric hindrances between the neighboring chain members, whereas in polymorph  $\beta$  the molecules are H-bonded into dimers. No phase transition between the catemeric and dimeric CBrClF<sub>2</sub>COOH polymorphs, despite over-pressurizing phase  $\alpha$  by over 1.3 GPa into the stability region of phase  $\beta$ , demonstrates that the preference for dimeric and catemeric forms of carboxylic acids may be impossible for detection as classical solid-state phase transitions, without completely dissolving or melting these compounds and avoiding their nucleation. The smaller volume of the  $\beta$  phase, and hence its high-pressure stability, has been rationalized by more freedom of the zero-dimensional dimers to adjust their positions in the crystal structure, compared to the 1-dimensional catemers. The conformational limitations of the carboxylic-acid aggregates are consistent with the survey of all carboxylic-acid structures determined so far.

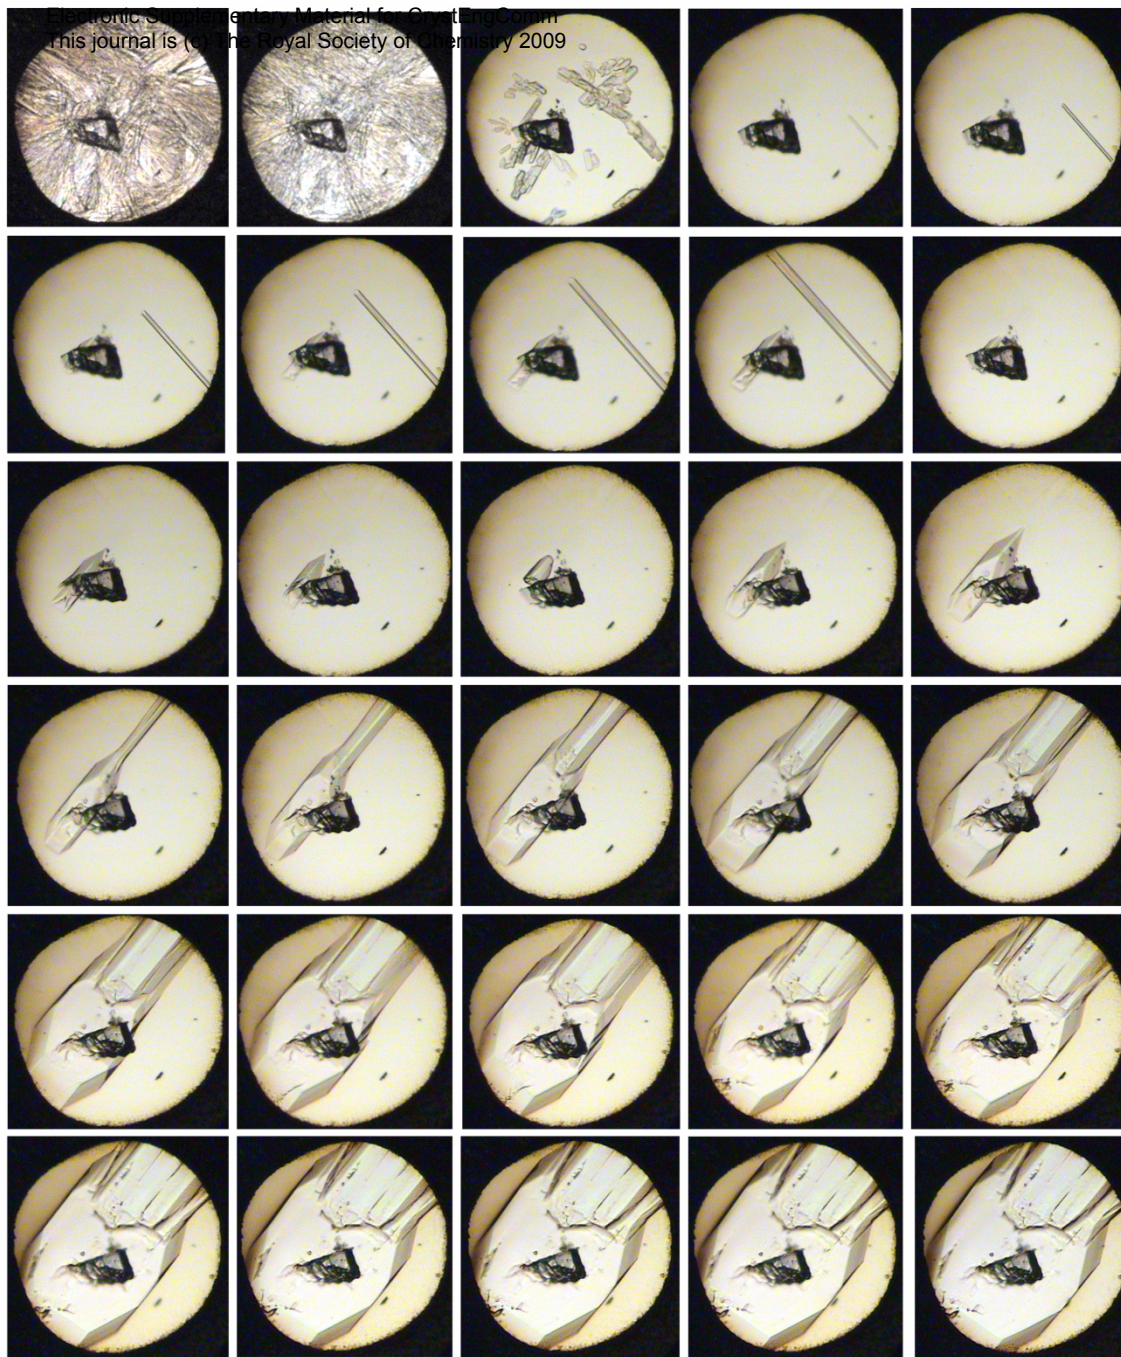

**Figure S1.** Stages of crystal growth of the CBrClFCOOH polymorph  $\alpha$  sample in the DAC from polycrystalline mass to the single crystal at 296 K/ 0.59 GPa. The ruby for pressure calibration is placed below the center of the DAC chamber. Presented sequence of photographs was recorded during 3 hours.

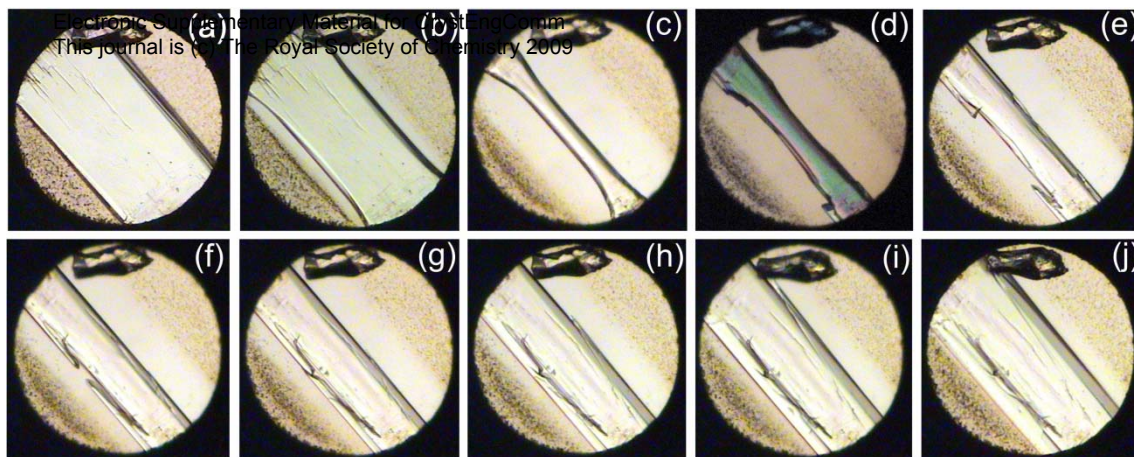

**Figure S2.** The process of CBrClFCOOH crystal growth of seeded polymorph  $\alpha$  in the pressure region of stable polymorph  $\beta$ : (a) polymorph  $\alpha$  seed at 0.28 GPa/ 300 K; (c) 370 K; (d) at 370 K immediately after increasing pressure; (e-i) gradual decrease of temperature from 360 to 300 K; and (j) 1.93 GPa/ 296 K. Presented sequence of photographs was recorded during 3 hours.

**Table S1.** Donohue angles (i.e. angles  $\eta'_d = \text{C}-\text{O}\cdots\text{O}'$  and  $\eta'_a = \text{C}=\text{O}\cdots\text{O}'$ ) for the hydrogen bonds in CBrClFCOOH molecules in phases  $\alpha$  and  $\beta$ .

| Pressure (GPa)      | Molecule A             |                        | Molecule B             |                        |
|---------------------|------------------------|------------------------|------------------------|------------------------|
|                     | $\eta'_a$ ( $^\circ$ ) | $\eta'_d$ ( $^\circ$ ) | $\eta'_a$ ( $^\circ$ ) | $\eta'_d$ ( $^\circ$ ) |
| 0.28 phase $\alpha$ | 145(2)                 | 111(1)                 | 137(3)                 | 111(2)                 |
| 0.59 phase $\alpha$ | 146(1)                 | 111(1)                 | 134(1)                 | 114(1)                 |
| 0.80 phase $\beta$  | 121.1(9)               | 111.7(8)               | –                      | –                      |
| 1.37 phase $\beta$  | 119.3(7)               | 111.4(7)               | –                      | –                      |
| 1.93 phase $\alpha$ | 136(4)                 | 107(2)                 | 136(3)                 | 110(3)                 |

Electronic Supplementary Material for CrystEngComm  
 This journal is (c) The Royal Society of Chemistry 2009  
**Table S2.** Selected experimental and crystal data for CBrClFOOH at phase  $\alpha$  and  $\beta$ .

|                              |                                      |                                      |                                       |                                       |                                      |
|------------------------------|--------------------------------------|--------------------------------------|---------------------------------------|---------------------------------------|--------------------------------------|
| Pressure (GPa)               | 0.28                                 | 0.59                                 | 0.80                                  | 1.37                                  | 1.93                                 |
| Temperature (K)              | 296                                  | 296                                  | 296                                   | 296                                   | 296                                  |
| Crystal data                 |                                      |                                      |                                       |                                       |                                      |
| Chemical formula             | C <sub>2</sub> HBrClFO <sub>2</sub>  | C <sub>2</sub> HBrClFO <sub>2</sub>  | C <sub>2</sub> HBrClFO <sub>2</sub>   | C <sub>2</sub> HBrClFO <sub>2</sub>   | C <sub>2</sub> HBrClFO <sub>2</sub>  |
| $M_r$                        | 191.39                               | 191.39                               | 191.39                                | 191.39                                | 191.39                               |
| Cell setting,<br>space group | Orthorhombic<br><i>Pbcn</i>          | Orthorhombic<br><i>Pbcn</i>          | Monoclinic<br><i>P2<sub>1</sub>/c</i> | Monoclinic<br><i>P2<sub>1</sub>/c</i> | Orthorhombic<br><i>Pbcn</i>          |
| $a$ (Å)                      | 16.458 (5)                           | 16.169 (4)                           | 7.898 (2)                             | 7.730 (3)                             | 15.274 (4)                           |
| $b$ (Å)                      | 6.0708 (4)                           | 6.0038 (16)                          | 7.840 (3)                             | 7.685 (3)                             | 5.8537 (3)                           |
| $c$ (Å)                      | 21.0950 (12)                         | 20.971 (4)                           | 8.043 (2)                             | 7.997 (2)                             | 20.7562 (12)                         |
| $\alpha$ (°)                 | 90.00                                | 90.00                                | 90.00                                 | 90.00                                 | 90.00                                |
| $\beta$ (°)                  | 90.00                                | 90.00                                | 95.553 (14)                           | 95.74 (2)                             | 90.00                                |
| $V$ (Å <sup>3</sup> )        | 2107.7 (6)                           | 2035.7 (9)                           | 495.6 (2)                             | 472.7 (3)                             | 1855.9 (5)                           |
| $Z$                          | 16                                   | 16                                   | 4                                     | 4                                     | 16                                   |
| $D_x$ (Mg m <sup>-3</sup> )  | 2.413                                | 2.498                                | 2.565                                 | 2.689                                 | 2.740                                |
| Radiation type               | Mo $K\alpha$                         | Mo $K\alpha$                         | Mo $K\alpha$                          | Mo $K\alpha$                          | Mo $K\alpha$                         |
| $\mu$ (mm <sup>-1</sup> )    | 8.21                                 | 8.50                                 | 8.73                                  | 9.15                                  | 9.33                                 |
| Crystal form,<br>colour      | colourless                           | colourless                           | colourless                            | colourless                            | colourless                           |
| Crystal size<br>(mm)         | 0.450 × 0.450<br>× 0.085             | 0.460 × 0.470<br>× 0.085             | 0.460 × 0.470<br>× 0.085              | 0.450 × 0.460<br>× 0.085              | 0.430 × 0.430<br>× 0.085             |
| Data collection              |                                      |                                      |                                       |                                       |                                      |
| Diffractometer               | Kuma KM4<br>CCD $\kappa$<br>geometry | Kuma KM4<br>CCD $\kappa$<br>geometry | Kuma KM4<br>CCD $\kappa$<br>geometry  | Kuma KM4<br>CCD $\kappa$<br>geometry  | Kuma KM4<br>CCD $\kappa$<br>geometry |
| Data collection<br>method    | $\omega$ scans                       | $\omega$ scans                       | $\omega$ scans                        | $\omega$ scans                        | $\omega$ scans                       |
| Absorption<br>correction     | analytical                           | analytical                           | analytical                            | analytical                            | analytical                           |
| $T_{\min}$                   | 0.33                                 | 0.32                                 | 0.33                                  | 0.33                                  | 0.33                                 |

|                                                                                               |                                                                                              |                                                                                             |                                                                                             |                                                                                             |                                                                                              |                        |
|-----------------------------------------------------------------------------------------------|----------------------------------------------------------------------------------------------|---------------------------------------------------------------------------------------------|---------------------------------------------------------------------------------------------|---------------------------------------------------------------------------------------------|----------------------------------------------------------------------------------------------|------------------------|
| Electronic Supplementary Material for this journal is (c) The Royal Society of Chemistry 2009 | 0.49                                                                                         | 0.49                                                                                        | 0.49                                                                                        | 0.49                                                                                        | 0.49                                                                                         |                        |
| No. of measured, independent and observed reflections                                         | 6686, 413                                                                                    | 481, 7980, 628                                                                              | 706, 2252, 308                                                                              | 320, 1961, 259                                                                              | 277, 7353, 407                                                                               | 439                    |
| Criterion for observed reflections                                                            | $I > 2\sigma(I)$                                                                             | $I > 2\sigma(I)$                                                                            | $I > 2\sigma(I)$                                                                            | $I > 2\sigma(I)$                                                                            | $I > 2\sigma(I)$                                                                             | $I > 2\sigma(I)$       |
| $R_{\text{int}}$                                                                              | 0.056                                                                                        | 0.069                                                                                       | 0.051                                                                                       | 0.061                                                                                       | 0.109                                                                                        |                        |
| $\theta_{\text{max}}$ (°)                                                                     | 25.0                                                                                         | 25.0                                                                                        | 25.0                                                                                        | 25.0                                                                                        | 25.0                                                                                         |                        |
| range of h, k, l                                                                              | -4<=h<=4                                                                                     | -14<=h<=14                                                                                  | -7<=h<=7                                                                                    | -7<=h<=7                                                                                    | -3<=h<=3                                                                                     |                        |
|                                                                                               | -7<=k<=7                                                                                     | -5<=k<=5                                                                                    | -7<=k<=7                                                                                    | -7<=k<=7                                                                                    | -6<=k<=6                                                                                     |                        |
|                                                                                               | -25<=l<=25                                                                                   | -24<=l<=24                                                                                  | -9<=l<=9                                                                                    | -9<=l<=9                                                                                    | -24<=l<=24                                                                                   |                        |
| Refinement                                                                                    |                                                                                              |                                                                                             |                                                                                             |                                                                                             |                                                                                              |                        |
| Refinement on                                                                                 | $F^2$                                                                                        | $F^2$                                                                                       | $F^2$                                                                                       | $F^2$                                                                                       | $F^2$                                                                                        | $F^2$                  |
| $R[F^2 > 2\sigma(F^2)]$ , $wR(F^2)$ , $S$                                                     | 0.068, 0.170, 1.20                                                                           | 0.062, 0.153, 1.03                                                                          | 0.058, 0.175, 1.20                                                                          | 0.044, 0.120, 1.17                                                                          | 0.108, 0.282, 1.24                                                                           |                        |
| No. of reflections                                                                            | 481 reflections                                                                              | 706 reflections                                                                             | 320 reflections                                                                             | 277 reflections                                                                             | 439 reflections                                                                              |                        |
| No. of parameters                                                                             | 92                                                                                           | 122                                                                                         | 55                                                                                          | 55                                                                                          | 82                                                                                           |                        |
| H-atom treatment                                                                              | constrained refinement                                                                       | constrained refinement                                                                      | constrained refinement                                                                      | constrained refinement                                                                      | constrained refinement                                                                       | constrained refinement |
| Weighting scheme                                                                              | Calculated $w = 1/[\sigma^2(F_o^2) + (0.0861P)^2 + 12.5069P]$ where $P = (F_o^2 + 2F_c^2)/3$ | Calculated $w = 1/[\sigma^2(F_o^2) + (0.0789P)^2 + 20.276P]$ where $P = (F_o^2 + 2F_c^2)/3$ | Calculated $w = 1/[\sigma^2(F_o^2) + (0.0959P)^2 + 4.4939P]$ where $P = (F_o^2 + 2F_c^2)/3$ | Calculated $w = 1/[\sigma^2(F_o^2) + (0.0616P)^2 + 3.4947P]$ where $P = (F_o^2 + 2F_c^2)/3$ | Calculated $w = 1/[\sigma^2(F_o^2) + (0.1475P)^2 + 59.0716P]$ where $P = (F_o^2 + 2F_c^2)/3$ |                        |
| $(\Delta/\sigma)_{\text{max}}$                                                                | <0.0001                                                                                      | 0.001                                                                                       | <0.0001                                                                                     | <0.0001                                                                                     | 0.001                                                                                        |                        |
| $\Delta\rho_{\text{max}}$ , $\Delta\rho_{\text{min}}$ (e Å <sup>-3</sup> )                    | 0.28, -0.33                                                                                  | 0.36, -0.36                                                                                 | 0.56, -0.47                                                                                 | 0.40, -0.41                                                                                 | 0.69, -0.68                                                                                  |                        |
